# Supplementary material for: Human milk miRNAs primarily originate from the mammary gland resulting in unique miRNA profiles of fractionated milk
Source: PubMed Central journal article supplement (PMC4745068; doi:10.1038/srep20680), 2016-02-08
Supplement: srep20680-s2.pdf [file srep20680-s2.pdf]

# SUPPLEMENTARY FIGURES

## Human milk miRNAs primarily originate from the mammary gland resulting in unique miRNA profiles of fractionated milk

Mohammed Alsaweed, Ching Tat Lai, Peter E. Hartmann, Donna T. Geddes, Foteini Kakulas

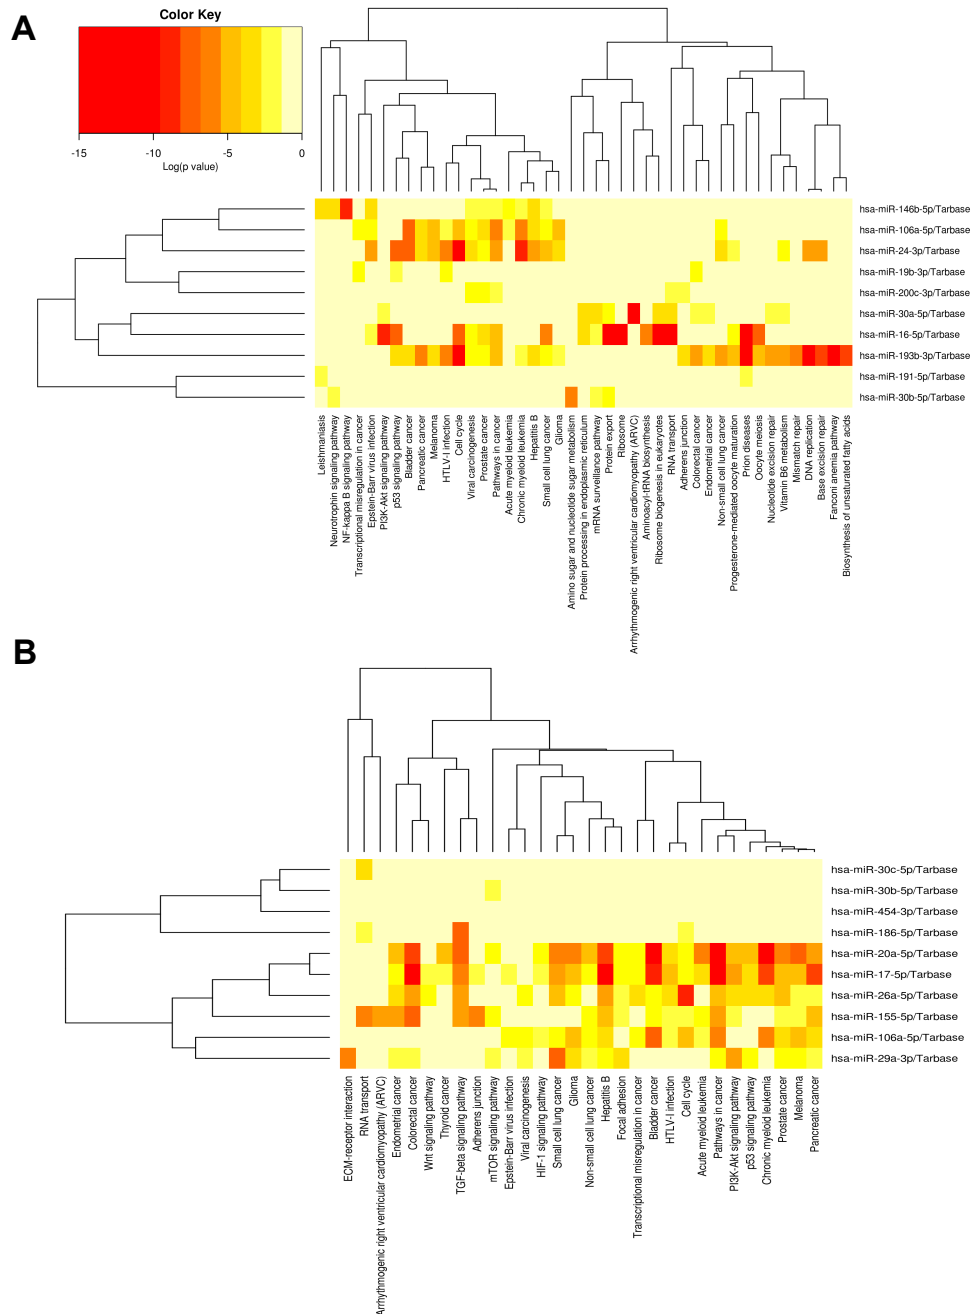

**Figure S1.** Heat maps showing the top 10 most highly expressed miRNAs in **(A)** human milk cells and lipids and **(B)** maternal PBMCs, and their contribution in different signalling and metabolic pathways annotated to mirPath tool<sup>56</sup>.

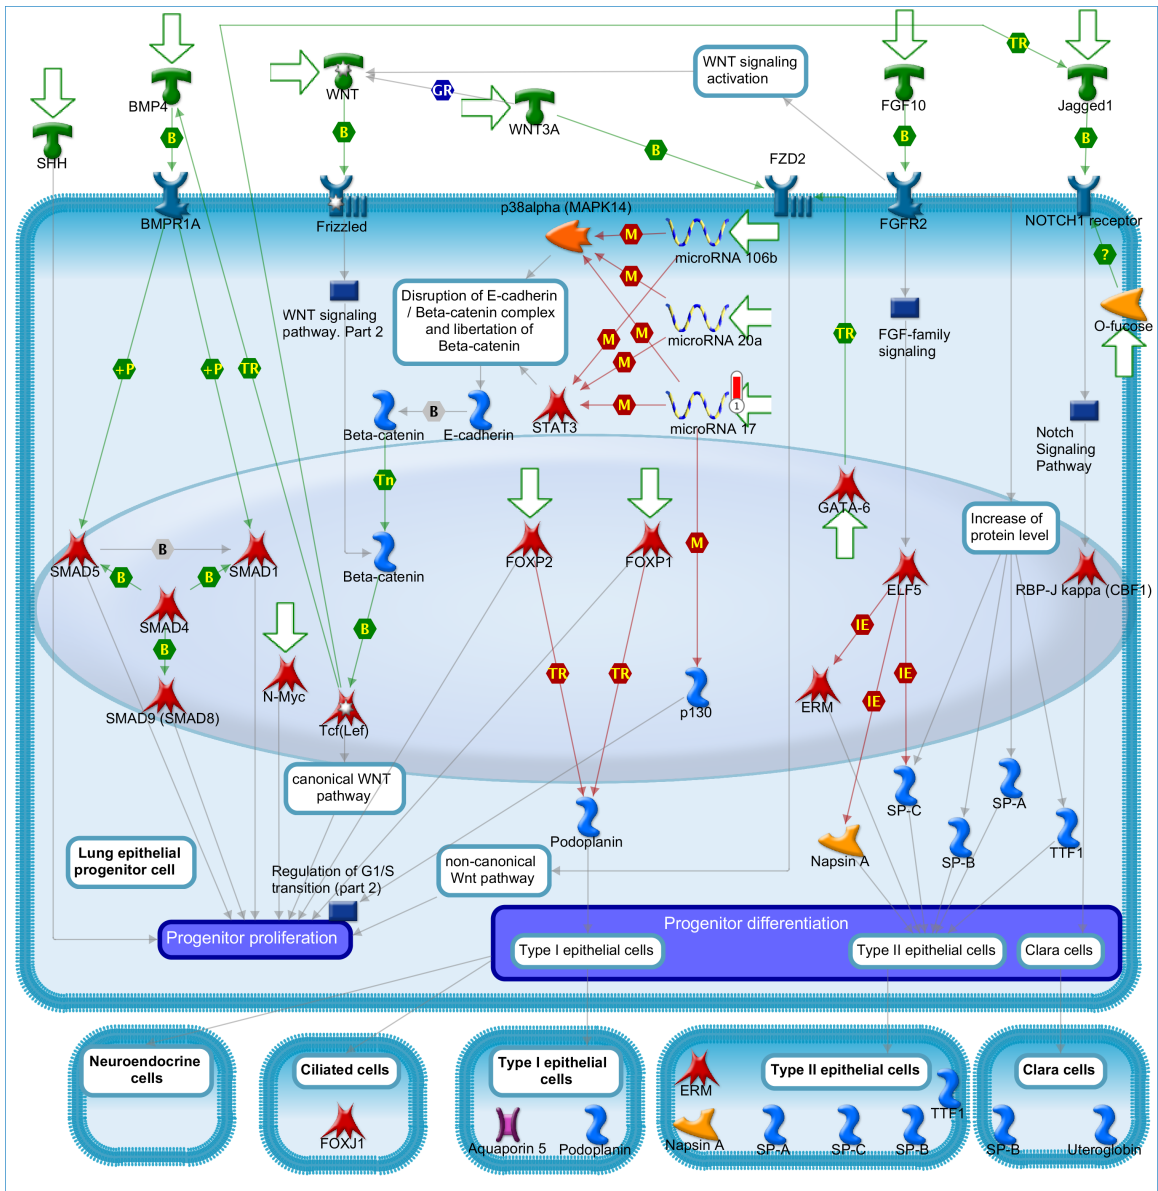

**Figure S2.** Interaction between and roles of reliable miRNAs that were differentially expressed in the regulation of lung epithelial progenitor cell differentiation (MetaCore pathway analysis).

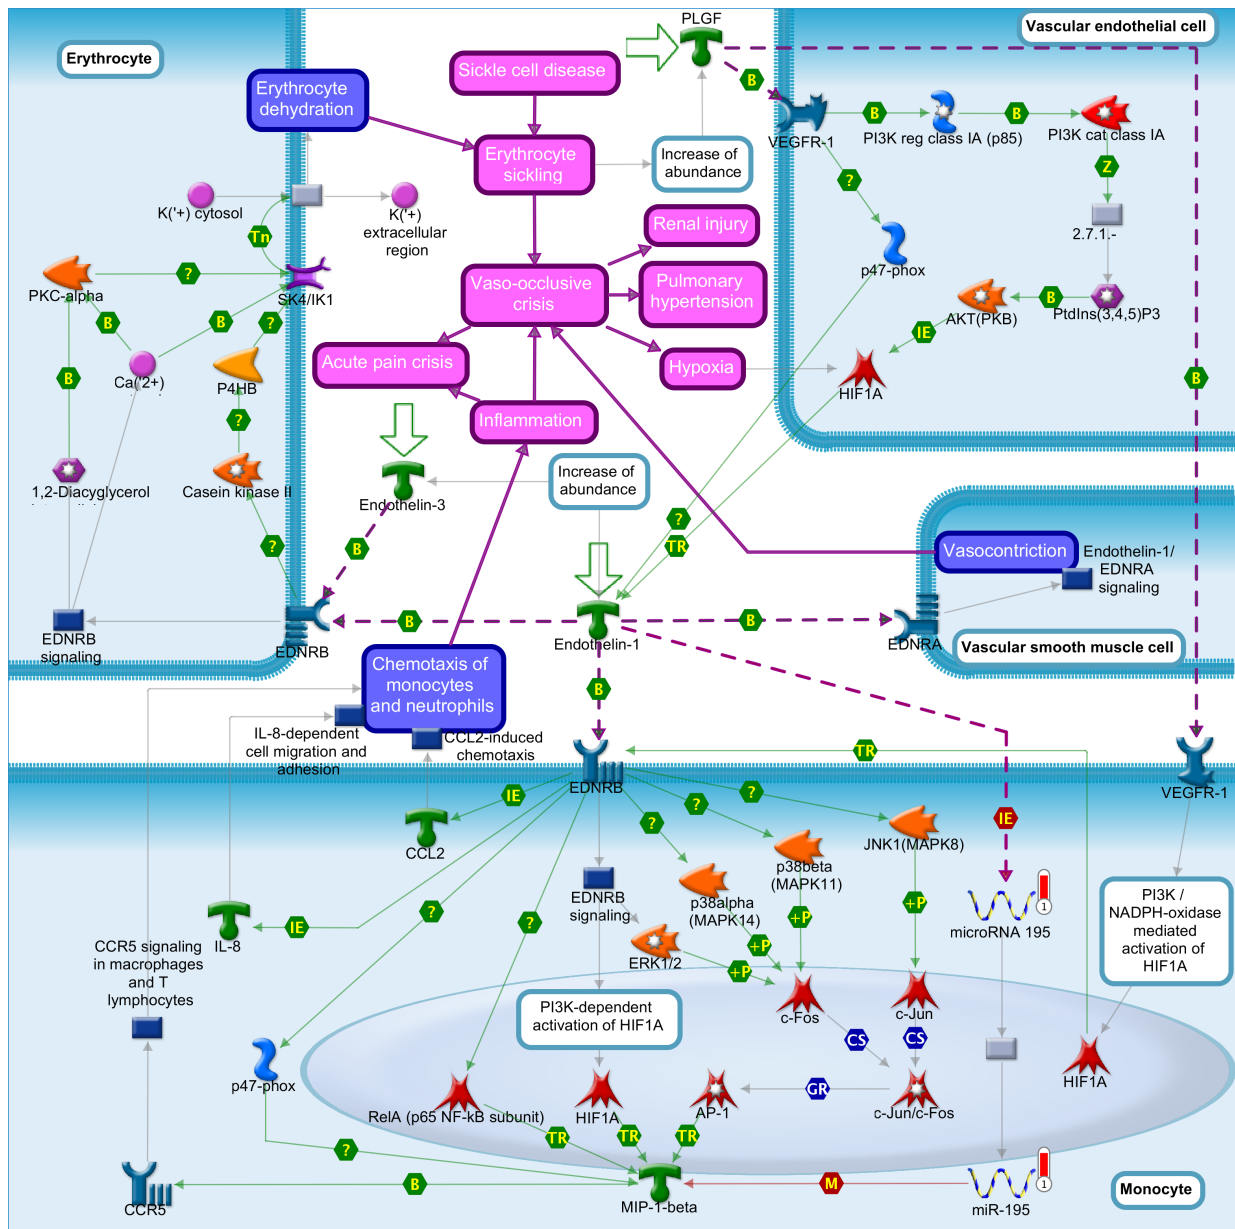

**Figure S3.** Interaction between and roles of reliable miRNAs that were differentially expressed in endothelin-1 pathway of inflammation and vasoconstriction in Sickle cell disease (MetaCore pathway analysis).

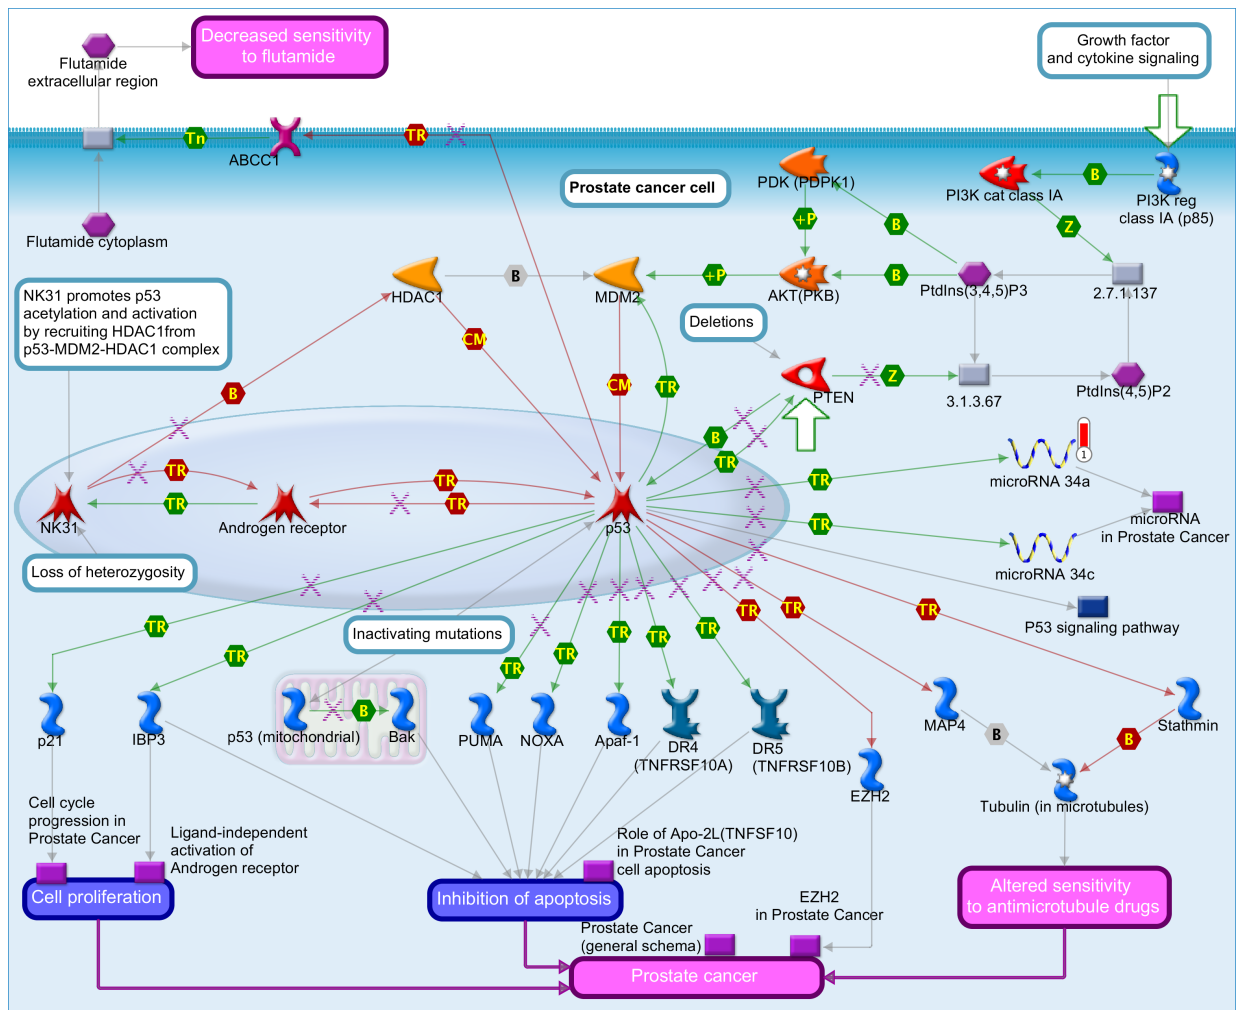

**Figure S4.** Interaction between and roles of reliable miRNAs that were differentially expressed in p53 signaling in prostate cancer (MetaCore pathway analysis).

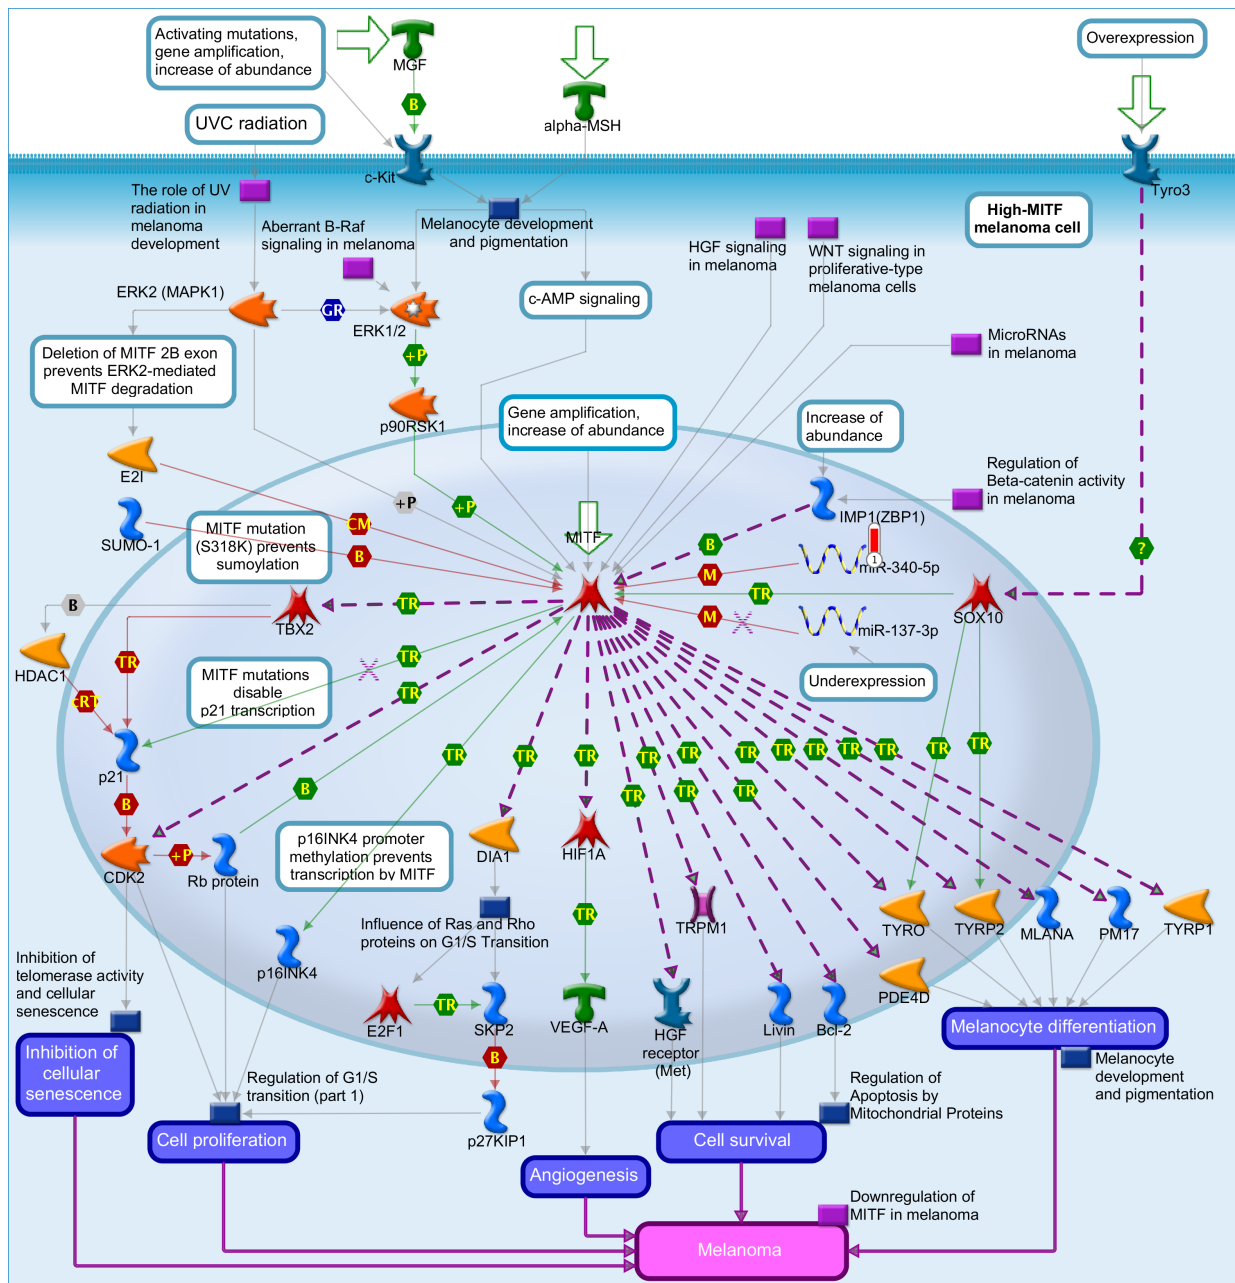

**Figure S5.** Interaction between and roles of reliable miRNAs that were differentially expressed in the upregulation of MTF in melanoma (MetaCore pathway analysis).

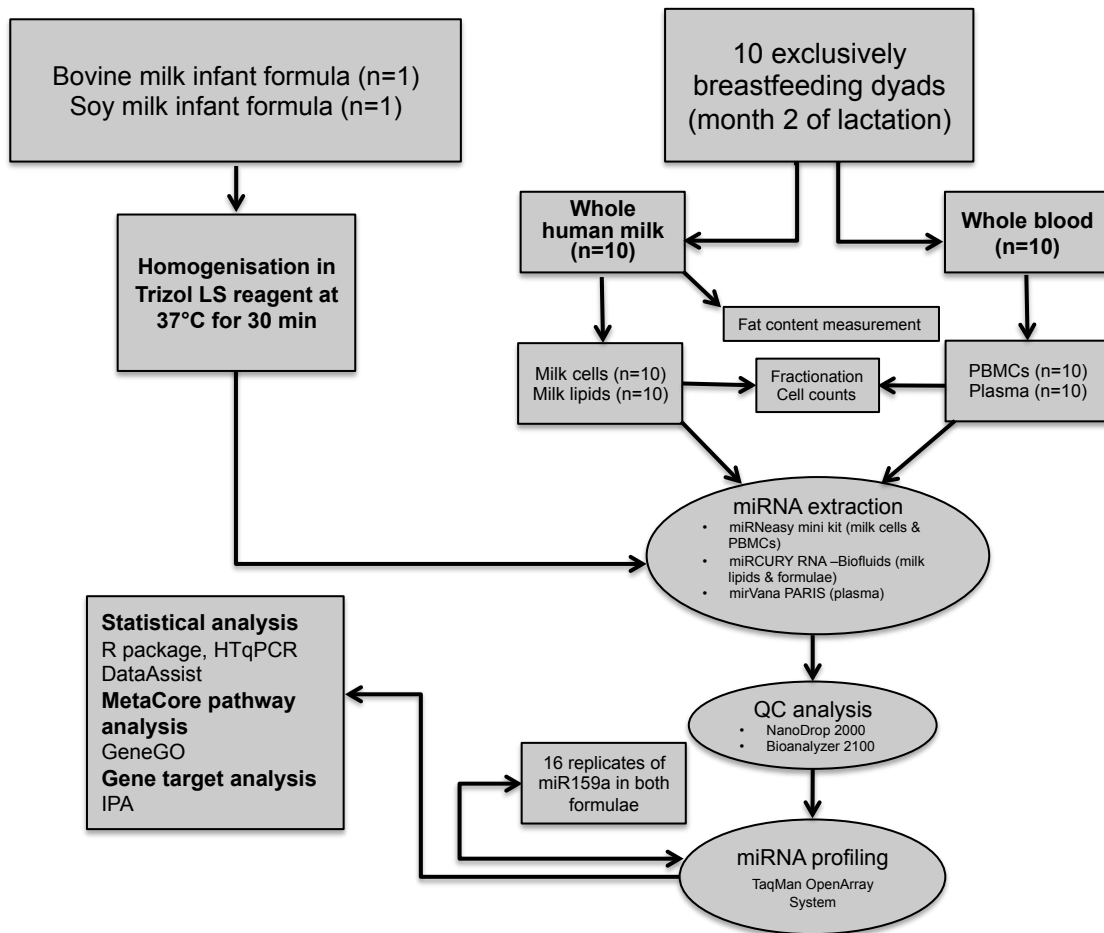

**Figure S6.** Flowchart describing the main steps of the study.
